# Supplementary material for: Improvement of RNA In Situ Hybridisation for Grapevine Fruits and Ovules
Source: MDPI journal article supplement (doi:10.3390/ijms24010800), 2023-01-02
Supplement: s1 [file s1]

## **Improvement of RNA in situ hybridization for grapevine fruit and ovule**

Jin Yao<sup>1, 2†</sup>, Xingmei Li<sup>1, 2†</sup>, Na Wu<sup>1, 2</sup>, Songlin Zhang<sup>1, 2</sup>, Min Gao<sup>1, 2\*</sup>, Xiping Wang<sup>1, 2\*</sup>

1 State Key Laboratory of Crop Stress Biology in Arid Areas, College of Horticulture, Northwest A&F University, Yangling, Shaanxi 712100, China

2 Key Laboratory of Horticultural Plant Biology and Germplasm Innovation in Northwest China, Ministry of Agriculture, Northwest A&F University, Yangling, Shaanxi 712100, China

\* Correspondence: mingao@nwfau.edu.cn (M.G.); wangxiping@nwsuaf.edu.cn (X.W.); Tel.: +86-29-87082613 (M.G.); +86-29-87082129 (X.W.)

† These authors contributed equally to this work.

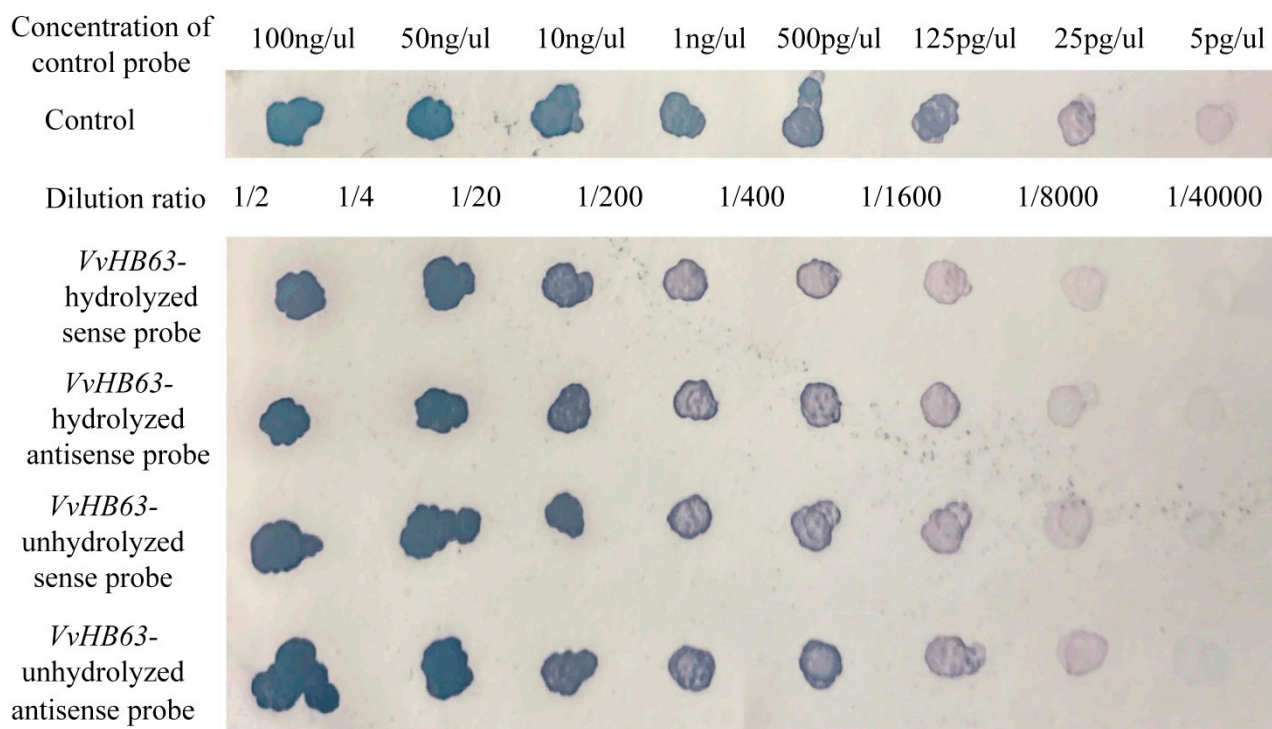

Figure S1. Semi-quantitative analysis of *VvTAU* probe by dot blot hybridization.

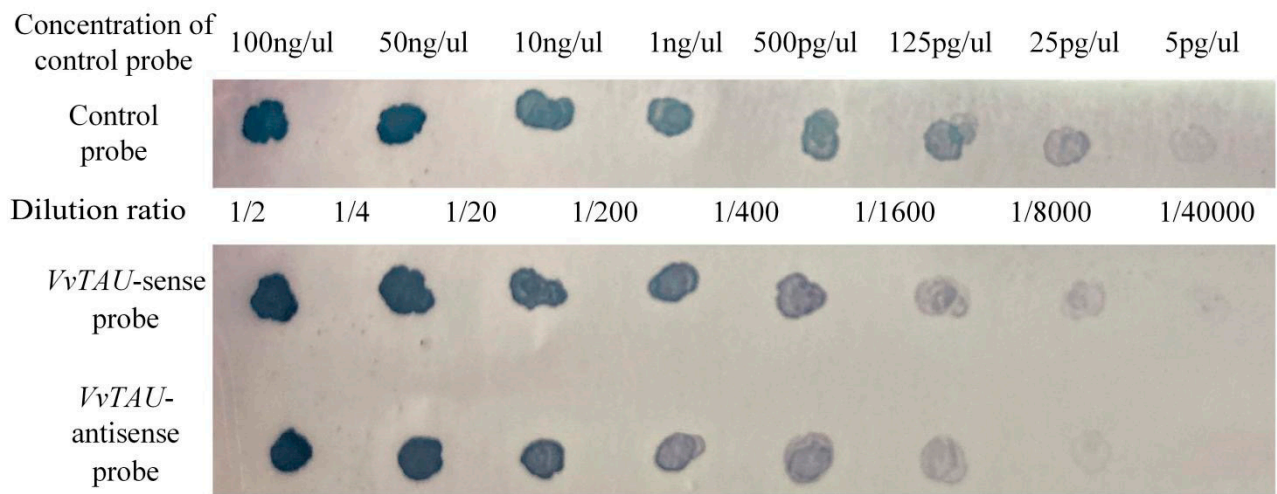

Figure S2. Semi-quantitative analysis of *VvHB63*probe by dot blot hybridization.

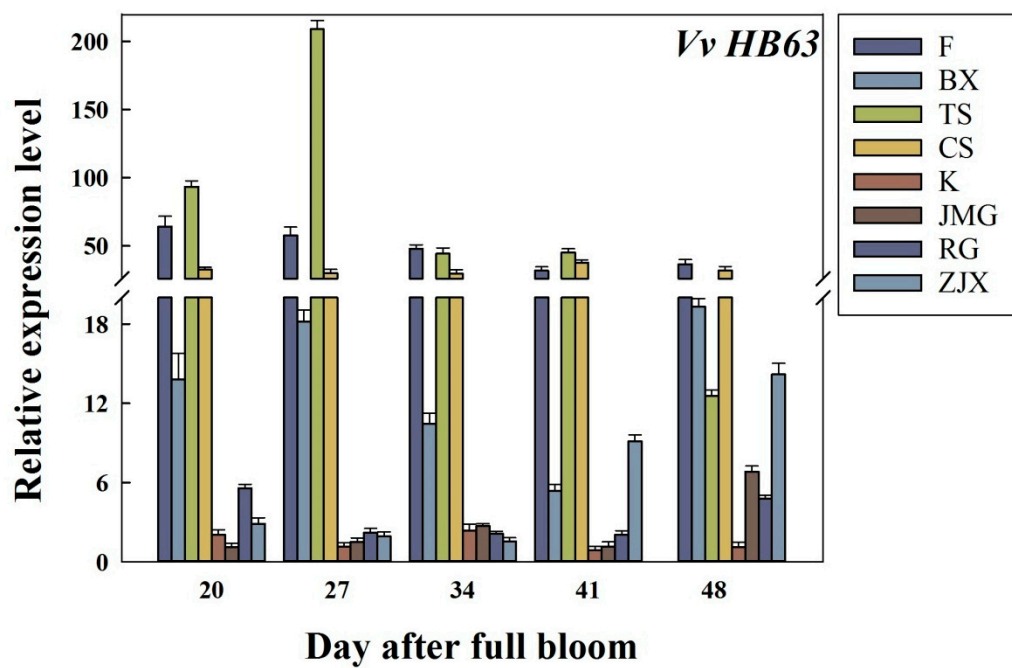

Figure S3. Expression patterns of grape *VvHB63* in ovules from eight grape cultivars. Seedless cultivars: Flame Seedless (F), Bi Xiang Seedless (BX), Thompson Seedless (TS), Crimson Seedless (CS), Seeded cultivars: Kyoho (K), Ju Mei Gui (JMG), Red Globe (RG), Zui Jin Xiang (ZJX). Using *VvGAPDH* and *VvEF1- $\alpha$*  genes followed by geometric averaging for determining a normalization factor.

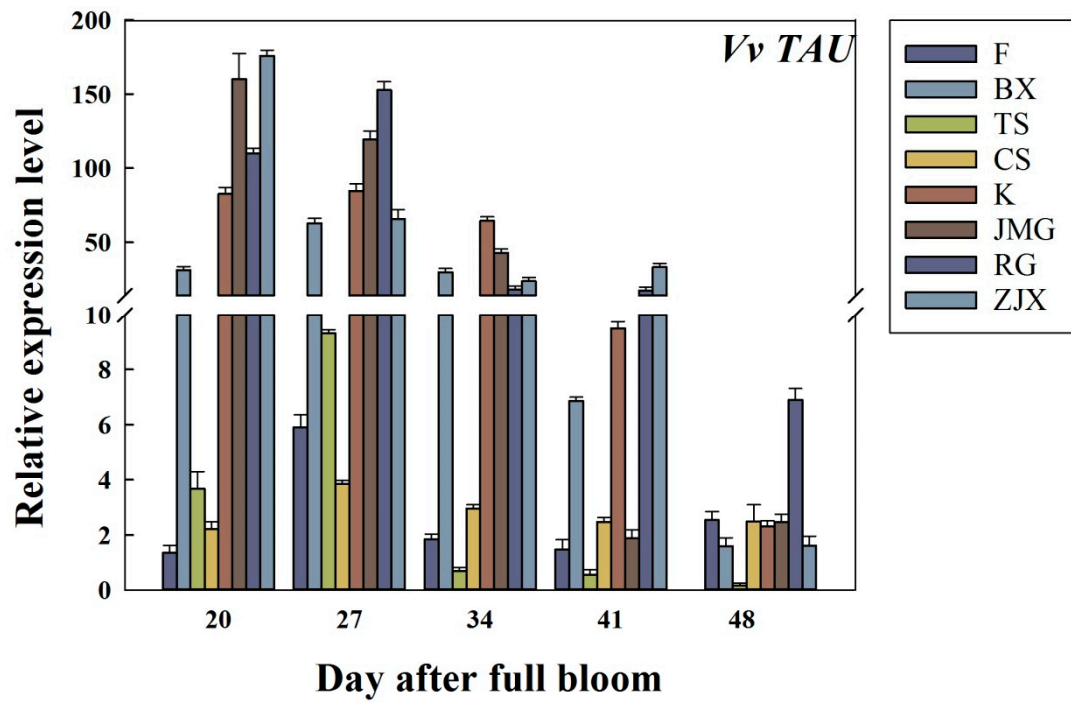

Figure S4. Expression patterns of grape *VvTAU* in ovules from eight grape cultivars. Seedless cultivars: Flame Seedless (F), Bi Xiang Seedless (BX), Thompson Seedless (TS), Crimson Seedless (CS), Seeded cultivars: Kyoho (K), Ju Mei Gui (JMG), Red Globe (RG), Zui Jin Xiang (ZJX). Using *VvGAPDH* and *VvEF1-a* genes followed by geometric averaging for determining a normalization factor.

Table S1: Reagent configuration method

| Reagent name              | component                                                                                                                                                                |
|---------------------------|--------------------------------------------------------------------------------------------------------------------------------------------------------------------------|
| 2× carbonate buffer       | 32ul 1M NaHCO <sub>3</sub> , 48ul 1M NaCO <sub>3</sub> ; 320ul DEPC-H <sub>2</sub> O                                                                                     |
| 10× PBS                   | 1.3M NaCl; 70mM Na <sub>2</sub> HPO <sub>4</sub> ; 30mM NaH <sub>2</sub> PO <sub>4</sub> ; DEPC-H <sub>2</sub> O                                                         |
| 10× TBS                   | 1M Tris-HCl pH7.5; 1.5M NaCl                                                                                                                                             |
| 20× SSC                   | 3M NaCl; 300mM Na citrate                                                                                                                                                |
| 5× NTE                    | 2.5M NaCl; 50mM Tris pH 8; 5mM EDTA; DEPC-H <sub>2</sub> O                                                                                                               |
| Buffer C                  | 100mM Tris-HCl pH9.5; 50mM MgCl <sub>2</sub> ; 100mM NaCl                                                                                                                |
| 1% Blocking buffer        | 1% in 1× TBS                                                                                                                                                             |
| 10x proteinase K buffer   | 100mM Tris pH8; 50mM EDTA                                                                                                                                                |
| Acetic anhydride solution | 3ml in 600ml 0.1M triethanolamine-HCl, pH 8 (11.142g, 600ml H <sub>2</sub> O, 3ml 10M NaOH for the pH)                                                                   |
| 4% paraformaldehyde       | 4% in 1× PBS                                                                                                                                                             |
| 10× in situ salts         | 3M NaCl ; 100mM Tris-HCl pH8; 100mM Na phosphate, pH 6.8; 50mM EDTA; DEPC H <sub>2</sub> O to 10ml; Store at -20C                                                        |
| hybridization buffer      | 0.3 M NaCl; 10mM Tris-HCl pH 6.8; 10mM NaHPO <sub>4</sub> pH 6.8; 5mM EDTA; 50% formamide; 10% dextran sulfate; 1xDernhardtts (0.02% each:Ficoll; PVP; BSA); 1mg/ml tRNA |
